# Supplementary material for: A modular chromosomally integrated toolkit for ectopic gene expression in Vibrio cholerae
Source: PubMed Central journal article supplement (PMC7505983; doi:10.1038/s41598-020-72387-8), 2020-09-21
Supplement: 41598_2020_72387_MOESM1_ESM.pdf [file 41598_2020_72387_MOESM1_ESM.pdf]

**Supporting Information for**

# A modular chromosomally integrated toolkit for ectopic gene expression in *Vibrio cholerae*

Triana N. Dalia<sup>1</sup>, Jennifer L. Chlebek<sup>1</sup>, and Ankur B. Dalia<sup>1,\*</sup>

<sup>1</sup>Department of Biology, Indiana University, Bloomington, IN 47405

\*Author for correspondence: [ankdalia@indiana.edu](mailto:ankdalia@indiana.edu)

**This PDF file includes:**

Fig. S1

Tables S1-S2

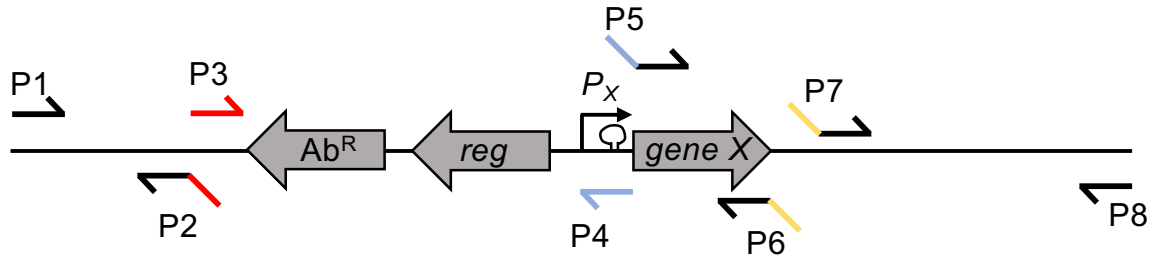

P1: BBC832 - GCTTTTTGCTACAACGACCG  
 P2: BBC828 - caccatacccacgccgaaacaaCAGTGATGTAGCGAATCGGAC  
 P3: BBC243 - TTGTTTCGGCGTGGGTATGGTG  
 P4-1 ( $P_{tac}$ -riboswitch or  $P_{BAD}$ -riboswitch): BBC2137 - CTTGTTGTTACCTCCTTAGCAGG  
 P5-1 ( $P_{tac}$ -riboswitch or  $P_{BAD}$ -riboswitch): cctgctaaggaggtaacaacaagATGXXXXXX  
 P4-2 ( $P_{tac}$  or  $P_{BAD}$ ): BBC203 - CCCGGGATCCTGTGTGAAATTG  
 P5-2 ( $P_{tac}$  or  $P_{BAD}$ ): caatttcacacaggatcccgggAGGAGGTNNNNNNATGXXXXXX  
 P6: ttaggctggagctgctcTTAYYYYYY  
 P7: BBC830 - gaagcagctccagcctacaGTTGAGTTGGATGCAGCACC  
 P8: BBC834 - CACAATTTCTCGCTTAAAATGTCC

**Fig. S1 - Details on how to assemble the ectopic expression constructs and swap out genes of interest.** A generic diagram of the ectopic expression construct is shown with the location of different primers needed to initially construct each expression construct (P1, P2, P3, P6, P7, and P8). As well as the primers to insert novel genes of interest into established expression constructs (P1, P4, P5, P6, P7, and P8).  $Ab^R$  = antibiotic resistance cassette,  $reg$  = regulatory gene ( $lacIq$  or  $araC$ ),  $P_x$  = the promoter ( $P_{tac}$ ,  $P_{BAD}$ ,  $P_{tac}$ -riboswitch, or  $P_{BAD}$ -riboswitch), and gene X = the gene of interest.

Establishing ectopic expression constructs at new genomic locations: The UP arm of homology is generated with P1 and P2, while the DOWN arm of homology is amplified with P7 and P8. In this example, these primers amplify homology arms to integrate the ectopic expression constructs into *V. cholerae* ChII. P2 and P7 contain tails that overlap any of the 4 ectopic expression constructs. To move intact expression constructs to new locations in the genome, they can be amplified with P3 and P6. This can serve as a MIDDLE arm to stitch to the UP and DOWN arms of homology.

To insert new genes of interest:

Once an ectopic expression construct has been introduced to a genetic locus, the gene of interest can be swapped out.

-To amplify a gene of interest to place within  $P_{tac}$ -riboswitch or  $P_{BAD}$ -riboswitch the forward P5-1 primer must have a 5' overlap region as indicated. Immediately after this overlap should be the start codon for the gene of interest (highlighted in green) + additional sequence to serve as a primer for the gene of interest (denoted by 'XXXXXX'). P5-1 overlaps with P4-1 (blue highlighted sequence), which sits within the theophylline-dependent riboswitch. Thus, the same overlap can be used to make either  $P_{tac}$ -riboswitch or  $P_{BAD}$ -riboswitch constructs. The reverse P6 primer for the gene of interest must have the tail indicated, which should be immediately followed by the stop codon of the gene (highlighted in purple – TAA stop codon in this example) + additional sequence to serve as a primer for the gene of interest (denoted by 'YYYYYY').

-To amplify a gene of interest to place within  $P_{tac}$  or  $P_{BAD}$  the forward P5-2 primer must have the 5' overlap region indicated. Immediately after this overlap should be the desired ribosome binding site (indicated in bold and underline – the 'optimal' RBS AGGAGGT is used in this example), which should be followed by a 6 bp spacer (this spacing between the ribosome binding site and the start codon is essential for optimal translation and can be derived from the native gene) + the start codon (highlighted in green) + additional sequence to serve as a primer for the gene of interest (denoted by 'XXXXXX'). P5-2 overlaps with P4-2 (blue highlighted sequence), which sits downstream of the two promoter elements. Thus, the same overlap can be used to make either  $P_{tac}$  or  $P_{BAD}$  constructs. The reverse P6 primer for the gene of interest can be made exactly as described above.

All amplified genes of interest serve as MIDDLE arms in SOE reactions with an UP arm amplified with P1 and P4, and a DOWN arm amplified with P7 and P8.

**Table S1 – Strains used in this study**

| Name                                                                  | Relevant figure(s) | Full genotype                                                                                                                                                                                                                                                                                      | Reference / Strain#            |
|-----------------------------------------------------------------------|--------------------|----------------------------------------------------------------------------------------------------------------------------------------------------------------------------------------------------------------------------------------------------------------------------------------------------|--------------------------------|
| parent                                                                | Fig. 2E            | E7946 <i>lacZ</i> ::FRT-Spec <sup>R</sup> -FRT                                                                                                                                                                                                                                                     | This study / SAD035            |
| <i>P<sub>tac</sub>-gfp</i>                                            | Fig. 2A, E; Fig. 3 | E7946 <i>lacZ</i> ::FRT-Spec <sup>R</sup> -FRT, $\Delta$ VCA0692:: <i>P<sub>tac</sub>-gfp</i> Carb <sup>R</sup>                                                                                                                                                                                    | This study / TND2290 (SAD2780) |
| <i>P<sub>BAD</sub>-gfp</i>                                            | Fig. 2B, E; Fig. 3 | E7946 <i>lacZ</i> ::FRT-Spec <sup>R</sup> -FRT, $\Delta$ VCA0692:: <i>P<sub>BAD</sub>-gfp</i> Carb <sup>R</sup>                                                                                                                                                                                    | This study / TND2291 (SAD2781) |
| <i>P<sub>tac</sub>-riboswitch-gfp</i>                                 | Fig. 2C, E; Fig. 3 | E7946 <i>lacZ</i> ::FRT-Spec <sup>R</sup> -FRT, $\Delta$ VCA0692:: <i>P<sub>tac</sub>-riboswitch-gfp</i> Carb <sup>R</sup>                                                                                                                                                                         | This study / TND2293 (SAD2782) |
| <i>P<sub>BAD</sub>-riboswitch-gfp</i>                                 | Fig. 2D, E; Fig. 3 | E7946 <i>lacZ</i> ::FRT-Spec <sup>R</sup> -FRT, $\Delta$ VCA0692:: <i>P<sub>BAD</sub>-riboswitch-gfp</i> Carb <sup>R</sup>                                                                                                                                                                         | This study / TND2292 (SAD2783) |
| wildtype                                                              | Fig. 4A            | E7946                                                                                                                                                                                                                                                                                              | (25) / SAD031                  |
| <i>P<sub>BAD</sub>-Flp</i>                                            | Fig. 4A-B          | E7946 <i>lacZ</i> ::FRT-Spec <sup>R</sup> -FRT, $\Delta$ VCA0692:: <i>P<sub>BAD</sub>-Flp</i> Carb <sup>R</sup>                                                                                                                                                                                    | This study / TND2083 (SAD2784) |
| <i>P<sub>tac</sub>-riboswitch-Flp</i>                                 | Fig. 4B            | E7946 <i>lacZ</i> ::FRT-Spec <sup>R</sup> -FRT, $\Delta$ VCA0692:: <i>P<sub>tac</sub>-riboswitch-Flp</i> Carb <sup>R</sup>                                                                                                                                                                         | This study / TND2289 (SAD2785) |
| <i>P<sub>BAD</sub>-riboswitch-Flp</i>                                 | Fig. 4B            | E7946 <i>lacZ</i> ::FRT-Spec <sup>R</sup> -FRT, $\Delta$ VCA0692:: <i>P<sub>BAD</sub>-riboswitch-Flp</i> Carb <sup>R</sup>                                                                                                                                                                         | This study / TND2086 (SAD2786) |
| $\Delta$ <i>pilB</i>                                                  | Fig. 5A            | E7946 Sm <sup>R</sup> , <i>P<sub>const</sub>-tfoX</i> , $\Delta$ luxO, <i>pilA</i> S67C, <i>lacZ</i> ::FRT-Kan <sup>R</sup> -FRT, $\Delta$ VC1807:: <i>CmR</i> , $\Delta$ <i>pilB</i>                                                                                                              | This study / TND2373 (SAD2787) |
| <i>P<sub>tac</sub>-pilB</i> $\Delta$ <i>pilB</i>                      | Fig. 5A            | E7946 Sm <sup>R</sup> , <i>P<sub>const</sub>-tfoX</i> , $\Delta$ luxO, <i>pilA</i> S67C, $\Delta$ <i>lacZ</i> :: <i>P<sub>tac</sub>-pilB</i> Spec <sup>R</sup> , $\Delta$ VC1807:: <i>CmR</i> , $\Delta$ <i>pilB</i>                                                                               | This study / JLC769 (SAD2788)  |
| <i>P<sub>BAD</sub>-pilB</i> $\Delta$ <i>pilB</i>                      | Fig. 5A            | E7946 Sm <sup>R</sup> , <i>P<sub>const</sub>-tfoX</i> , $\Delta$ luxO, <i>pilA</i> S67C, <i>lacZ</i> ::FRT-Kan <sup>R</sup> -FRT, $\Delta$ VC1807:: <i>CmR</i> , $\Delta$ <i>pilB</i> , $\Delta$ VCA0692:: <i>P<sub>BAD</sub>-pilB</i> Carb <sup>R</sup>                                           | This study / TND2403 (SAD2789) |
| <i>P<sub>tac</sub>-riboswitch-pilB</i> $\Delta$ <i>pilB</i>           | Fig. 5A            | E7946 Sm <sup>R</sup> , <i>P<sub>const</sub>-tfoX</i> , $\Delta$ luxO, <i>pilA</i> S67C, <i>lacZ</i> ::FRT-Kan <sup>R</sup> -FRT, $\Delta$ VC1807:: <i>CmR</i> , $\Delta$ <i>pilB</i> , $\Delta$ VCA0692:: <i>P<sub>tac</sub>-riboswitch-pilB</i> Carb <sup>R</sup>                                | This study / TND2402 (SAD2790) |
| <i>P<sub>BAD</sub>-riboswitch-pilB</i> $\Delta$ <i>pilB</i>           | Fig. 5A            | E7946 Sm <sup>R</sup> , <i>P<sub>const</sub>-tfoX</i> , $\Delta$ luxO, <i>pilA</i> S67C, <i>lacZ</i> ::FRT-Kan <sup>R</sup> -FRT, $\Delta$ VC1807:: <i>CmR</i> , $\Delta$ <i>pilB</i> , $\Delta$ VCA0692:: <i>P<sub>BAD</sub>-riboswitch-pilB</i> Carb <sup>R</sup>                                | This study / TND2378 (SAD2791) |
| <i>P<sub>tac</sub>-pilB</i> $\Delta$ <i>pilB</i> $\Delta$ <i>pilT</i> | Fig. 5B            | E7946 Sm <sup>R</sup> , <i>P<sub>const</sub>-tfoX</i> , $\Delta$ luxO, <i>pilA</i> S67C, $\Delta$ <i>lacZ</i> :: <i>P<sub>tac</sub>-pilB</i> Spec <sup>R</sup> , $\Delta$ VC1807:: <i>CmR</i> , $\Delta$ <i>pilB</i> , $\Delta$ <i>pilT</i> ::Zeo <sup>R</sup>                                     | This study / TND2498           |
| <i>P<sub>BAD</sub>-pilB</i> $\Delta$ <i>pilB</i> $\Delta$ <i>pilT</i> | Fig. 5B            | E7946 Sm <sup>R</sup> , <i>P<sub>const</sub>-tfoX</i> , $\Delta$ luxO, <i>pilA</i> S67C, <i>lacZ</i> ::FRT-Kan <sup>R</sup> -FRT, $\Delta$ VC1807:: <i>CmR</i> , $\Delta$ <i>pilB</i> , $\Delta$ VCA0692:: <i>P<sub>BAD</sub>-pilB</i> Carb <sup>R</sup> , $\Delta$ <i>pilT</i> ::Zeo <sup>R</sup> | This study / TND2501           |

|                                                                 |         |                                                                                                                                                                                                                                                                                   |                         |
|-----------------------------------------------------------------|---------|-----------------------------------------------------------------------------------------------------------------------------------------------------------------------------------------------------------------------------------------------------------------------------------|-------------------------|
| $P_{tac}$ -riboswitch- <i>pilB</i><br>$\Delta pilB \Delta pilT$ | Fig. 5B | E7946 Sm <sup>R</sup> , $P_{const}$ -tfoX, $\Delta luxO$ , <i>pilA</i> S67C,<br><i>lacZ</i> ::FRT-Kan <sup>R</sup> -FRT, $\Delta VC1807$ ::CmR, $\Delta pilB$ ,<br>$\Delta VCA0692$ :: $P_{tac}$ -riboswitch- <i>pilB</i> Carb <sup>R</sup> ,<br>$\Delta pilT$ ::Zeo <sup>R</sup> | This study /<br>TND2500 |
| $P_{BAD}$ -riboswitch- <i>pilB</i><br>$\Delta pilB \Delta pilT$ | Fig. 5B | E7946 Sm <sup>R</sup> , $P_{const}$ -tfoX, $\Delta luxO$ , <i>pilA</i> S67C,<br><i>lacZ</i> ::FRT-Kan <sup>R</sup> -FRT, $\Delta VC1807$ ::CmR, $\Delta pilB$ ,<br>$\Delta VCA0692$ :: $P_{BAD}$ -riboswitch- <i>pilB</i> Carb <sup>R</sup> ,<br>$\Delta pilT$ ::Zeo <sup>R</sup> | This study /<br>TND2499 |

**Table S2** – Primers used in this study

| Primer Name | Primer Sequence (5'→3')                                       | Description                                                                                                                       |
|-------------|---------------------------------------------------------------|-----------------------------------------------------------------------------------------------------------------------------------|
| BBC832      | GCTTTTTGCTACAACGACCG                                          | Replace VCA0692 w/ an ectopic expression construct UP ARM F1 (aka P1 in <b>Fig. S1</b> )                                          |
| BBC828      | caccatacccacgccgaaacaaCAGTGATGTAGCG<br>AATCGGAC               | Replace VCA0692 w/ an ectopic expression construct UP ARM R1 (aka P2 in <b>Fig. S1</b> )                                          |
| BBC830      | gaagcagctccagcctacaGTTGAGTTGGATGCAG<br>CACC                   | Replace VCA0692 w/ an ectopic expression construct DOWN ARM F2 (aka P7 in <b>Fig. S1</b> )                                        |
| BBC834      | CACAATTTCTCGCTTAAAATGTCC                                      | Replace VCA0692 w/ an ectopic expression construct DOWN ARM R2 (aka P8 in <b>Fig. S1</b> )                                        |
| BBC243      | TTGTTTCGGCGTGGGTATGGTG                                        | Amplify any ectopic expression construct to move to a new genetic locus F (aka P3 in <b>Fig. S1</b> )                             |
| BBC203      | CCCGGGATCCTGTGTGAAATTG                                        | Primer to clone new ectopic genes into $P_{tac}$ or $P_{BAD}$ constructs R1 (aka P4-2 in <b>Fig. S1</b> )                         |
| BBC2137     | CTTGTTGTTACCTCCTTAGCAGG                                       | Primer to clone new ectopic genes into $P_{tac}$ -riboswitch or $P_{BAD}$ -riboswitch constructs R1 (aka P4-1 in <b>Fig. S1</b> ) |
| BBC252      | caatttcacacaggatcccgggAGGAGGTAACGTAA<br>TGCGTAAAGGAGAAGAAC    | F Primer to amplify up <i>gfp</i> to clone into $P_{tac}$ or $P_{BAD}$ constructs (aka P5-2 in <b>Fig. S1</b> )                   |
| BBC2182     | cctgctaaggaggtacaacaagATGCGTAAAGGAG<br>AAGAACTTTTCAC          | F Primer to amplify up <i>gfp</i> to clone into $P_{tac}$ -riboswitch or $P_{BAD}$ -riboswitch (aka P5-1 in <b>Fig. S1</b> )      |
| BBC254      | tgtaggctggagctgcttcTTAGTTGTATAGTTCATC<br>CATGCC               | R Primer to amplify up <i>gfp</i> to clone into any ectopic expression construct (aka P6 in <b>Fig. S1</b> )                      |
| BBC2427     | caatttcacacaggatcccgggAGGAGGTTTTGTAT<br>GCCACAATTTGATATATTATG | F Primer to amplify up <i>Flp</i> to clone into $P_{tac}$ or $P_{BAD}$ constructs (aka P5-2 in <b>Fig. S1</b> )                   |
| BBC2455     | cctgctaaggaggtacaacaagATGCCACAATTTG<br>ATATATTATGTAAAAC       | F Primer to amplify up <i>Flp</i> to clone into $P_{tac}$ -riboswitch or $P_{BAD}$ -riboswitch (aka P5-1 in <b>Fig. S1</b> )      |
| BBC2428     | tgtaggctggagctgcttcTTATATGCGTCTATTTAT<br>GTAGGATG             | R Primer to amplify up <i>Flp</i> to clone into any ectopic expression construct (aka P6 in <b>Fig. S1</b> )                      |
| BBC1952     | caatttcacacaggatcccgggAGGAGGTAACTAA<br>TGCTACCAACCTTGTTG      | F Primer to amplify up <i>pilB</i> to clone into $P_{tac}$ or $P_{BAD}$ constructs (aka P5-2 in <b>Fig. S1</b> )                  |
| BBC2806     | cctgctaaggaggtacaacaagATGCTACCAACC<br>TTGTTGC                 | F Primer to amplify up <i>pilB</i> to clone into $P_{tac}$ -riboswitch or $P_{BAD}$ -riboswitch (aka P5-1 in <b>Fig. S1</b> )     |

|         |                                                       |                                                                                                                     |
|---------|-------------------------------------------------------|---------------------------------------------------------------------------------------------------------------------|
| BBC1953 | tgtaggctggagctgcttcTTAAAAGTAGAGCACAC<br>GCTG          | R Primer to amplify up <i>pilB</i> to clone<br>into any ectopic expression<br>construct (aka P6 in <b>Fig. S1</b> ) |
| ABD253  | GCGACCCACCGATGGG                                      | <i>lacZ</i> ::FRT-Ab <sup>R</sup> -FRT F1                                                                           |
| ABD263  | gtcgacggatccccggaatAACTGATCCAATTTTC<br>AGCGCATATTTTGG | <i>lacZ</i> ::FRT-Ab <sup>R</sup> -FRT R1                                                                           |
| ABD262  | gaagcagctccagcctacaTGCCGCAGGAAAACC<br>GCCCCCTaATC     | <i>lacZ</i> ::FRT-Ab <sup>R</sup> -FRT F2                                                                           |
| ABD256  | CCCAAATACGGCAACTTGGCG                                 | <i>lacZ</i> ::FRT-Ab <sup>R</sup> -FRT R2                                                                           |
| ABD123  | ATTCCGGGGATCCGTCGAC                                   | Amplify any Ab <sup>R</sup> cassette F                                                                              |
| ABD124  | TGTAGGCTGGAGCTGCTTC                                   | Amplify any Ab <sup>R</sup> cassette R                                                                              |
